# Supplementary material for: The biosynthetic genecluster of zorbamycin, a member of the bleomycin family of antitumor antibiotics, from Streptomyces flavoviridis ATCC 21892
Source: Royal Society of Chemistry journal article supplement (doi:10.1039/b814075h), 2008-11-12

## The Biosynthetic Gene Cluster of Zorbamycin, a Member of the Bleomycin Family of Antitumor Antibiotics, from *Streptomyces flavoviridis* ATCC 21892

Ute Galm,<sup>a</sup> Evelyn Wendt-Pienkowski,<sup>a</sup> Liyan Wang,<sup>a</sup> Nicholas P. George,<sup>b</sup> Tae-Jin Oh,<sup>a</sup>  
Fan Yi,<sup>a</sup> Meifeng Tao,<sup>a</sup> Jane M. Coughlin,<sup>c</sup> and Ben Shen<sup>\*abcd</sup>

<sup>a</sup>Division of Pharmaceutical Sciences, <sup>b</sup>Microbiology Doctoral Training Program, <sup>c</sup>Department of Chemistry, and <sup>d</sup>University of Wisconsin National Cooperative Drug Discovery Group, University of Wisconsin, Madison, WI 53705-2222, USA

\*Corresponding author. Mailing address: Division of Pharmaceutical Sciences, School of Pharmacy, University of Wisconsin-Madison, 777 Highland Ave., Madison, Wisconsin 53705-2222, USA. Tel: (608) 263-2673. Fax: (608) 262-5345. E-mail: bshen@pharmacy.wisc.edu.

### ELECTRONIC SUPPLEMENTARY INFORMATION (ESI)

|                 |    |
|-----------------|----|
| <b>Fig. S1.</b> | S2 |
| <b>Fig. S2.</b> | S3 |
| <b>Fig. S3.</b> | S6 |

**Fig. S1.** Schematic representation of the arrangement of the cyclization (Cy) and oxidation (Ox) domains within the thiazole forming NRPS modules of the ZBM biosynthetic machinery and approximate locations of the primer pairs used for their amplification. Abbreviations for NRPS domains are: A, adenylation; C, condensation; Cy, cyclization; Ox, oxidation; PCP, peptidyl carrier protein.

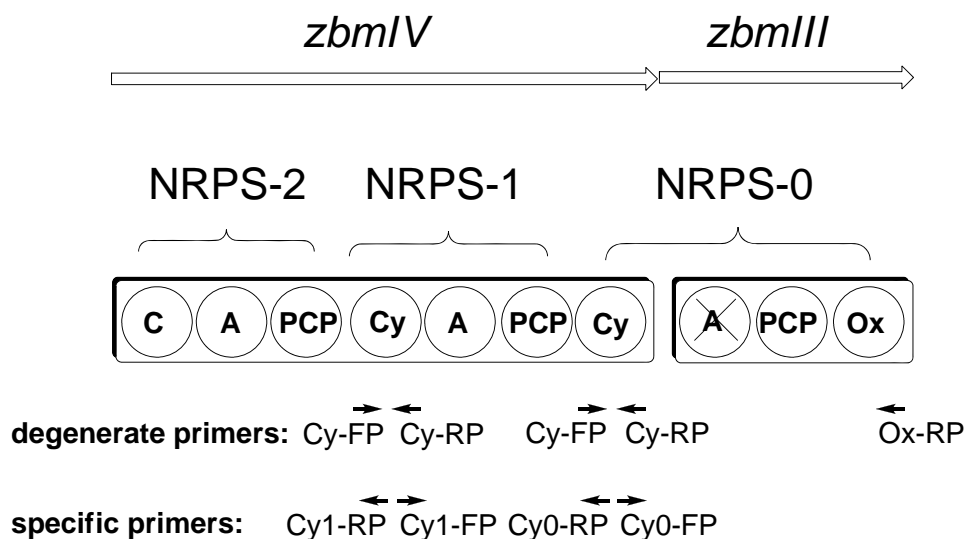

**Fig. S2.** Determination of the *zbm* gene cluster boundaries by gene replacements of *zbm-orf(-1)*, *zbm-orf2*, *zbm-orf4*, *zbmVIIId*, *zbmL*, and *zbm-orf41*.

(A) Construction of the *zbm-orf(-1)* gene replacement mutant and restriction map of *S. flavoviridis* SB9001 wild-type and SB9007 mutant strains showing fragment sizes upon *EcoRV*-*PstI* digestion.

(B) Southern analysis of SB9001 (lane 2) and SB9007 (lanes 3+4 are two individual isolates) genomic DNA digested with *EcoRV* and *PstI* using a 0.89-kb *PstI*-*KpnI* fragment as a probe. Lane 1, molecular weight marker.

(C) Construction of the *zbm-orf2* gene replacement mutant and restriction map of *S. flavoviridis* SB9001 wild-type and SB9008 mutant strains showing fragment sizes upon *SstI* digestion.

(D) Southern analysis of SB9001 (lane 5) and SB9008 (lanes 3+4 are two individual isolates) genomic DNA and inactivation plasmid harbouring the mutated *zbm-orf2* (lane 2) locus as control digested with *SstI* using a 1.499-kb PCR-amplified fragment as a probe (primer pair C-zorf1-f1 and C-zorf1-r1). Lane 1, molecular weight marker.

(E) Construction of the *zbm-orf4* gene replacement mutant and restriction map of *S. flavoviridis* SB9001 wild-type and SB9006 mutant strains showing fragment sizes upon *EcoRI*-*PstI* digestion.

(F) Southern analysis of SB9001 (lane 1) and SB9006 (lanes 2+3 are two individual isolates) genomic DNA and inactivation plasmid harbouring the mutated *zbm-orf4* (lane 4) locus as control digested with *EcoRI* and *PstI* using a 0.55-kb *EcoRV*-*EcoRI* fragment as a probe. Lane 5, molecular weight marker.

(G) Construction of the *zbmVIIId* gene replacement mutant and restriction map of *S. flavoviridis* SB9001 wild-type and SB9005 mutant strains showing fragment sizes upon *BamHI* digestion.

(H) Southern analysis of SB9001 (lane 5) and SB9005 (lanes 3+4 are two individual isolates) genomic DNA and inactivation plasmid harbouring the mutated *zbmVIIId* (lane 2) locus as control digested with *BamHI* using a 1.585-kb PCR-amplified fragment as a probe (primer pair C-zorf5-f1 and C-zorf5-r1). Lane 1, molecular weight marker.

(I) Construction of the *zbmL* gene replacement mutant and restriction map of *S. flavoviridis* SB9001 wild-type and SB9003 mutant strains showing fragment sizes upon *BamHI*-*KpnI* digestion.

(J) Southern analysis of SB9001 (lane 2) and SB9003 (lanes 3+4 are two individual isolates) genomic DNA digested with *BamHI* and *KpnI* using a 1.28-kb *BamHI*-*BglIII* fragment as a probe. Lane 1, molecular weight marker.

(K) Construction of the *zbm-orf41* gene replacement mutant and restriction map of *S. flavoviridis* SB9001 wild-type and SB9004 mutant strains showing fragment sizes upon *EcoRV*-*BglIII* digestion.

(L) Southern analysis of SB9001 (lane 2) and SB9004 (lane 3) genomic DNA digested with *EcoRV* and *BglIII* using a 1.09-kb *BamHI*-*NcoI* fragment as a probe. Lane 1, molecular weight marker.

B, *BamHI*; Bg, *BglIII*; E, *EcoRI*; EV, *EcoRV*; K, *KpnI*; N, *NcoI*; P, *PstI*; S, *SstI*; ApraR, apramycin resistant; ApraS, apramycin sensitive; ThiR, thiostrepton resistant; ThiS, thiostrepton sensitive.

**A**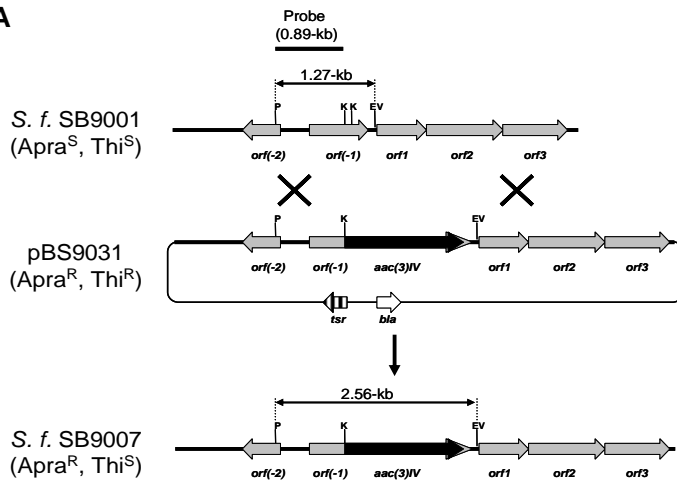**B**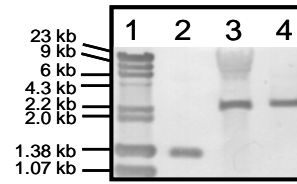**C**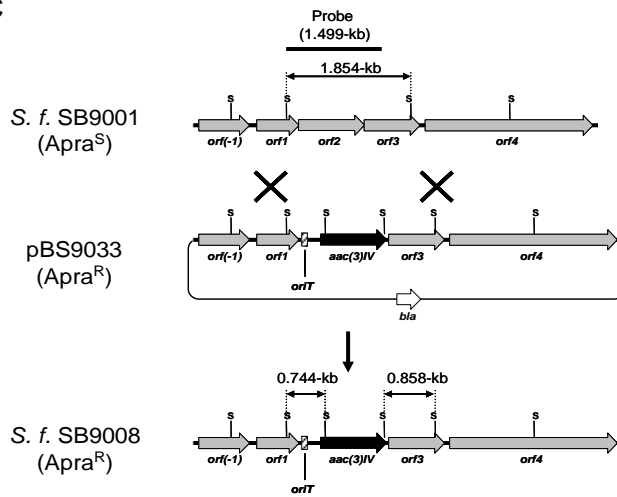**D**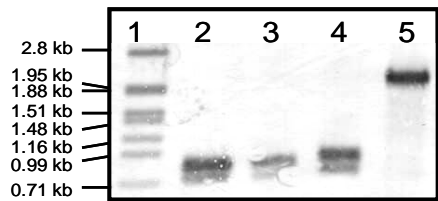**E**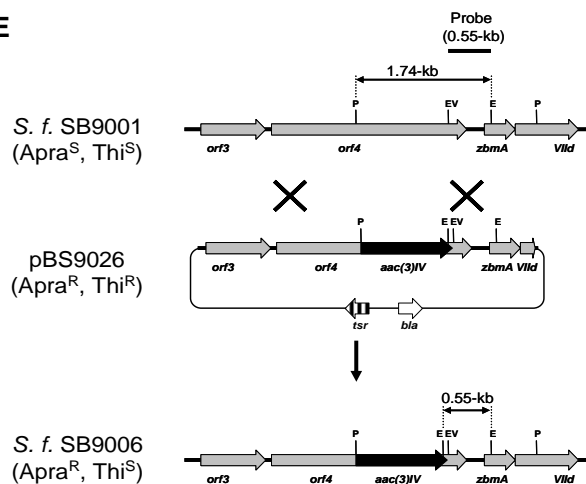**F**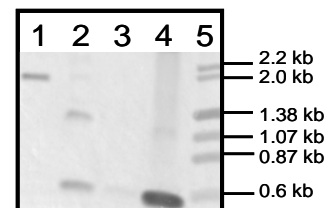

G

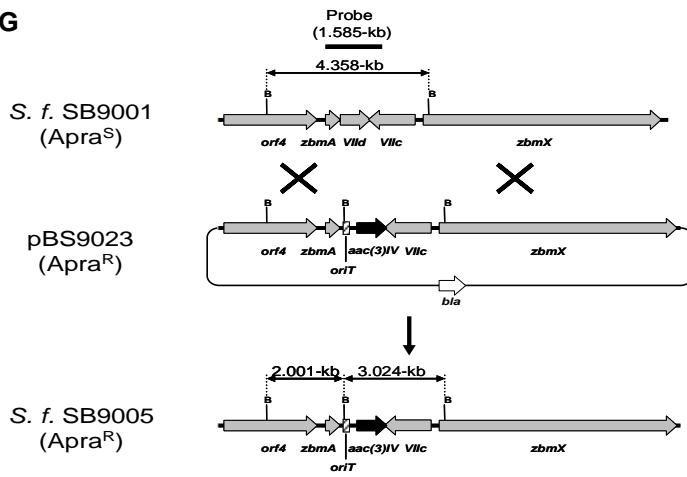

H

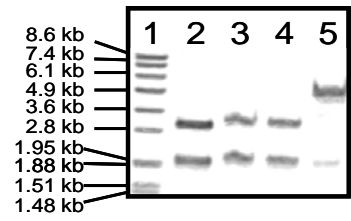

I

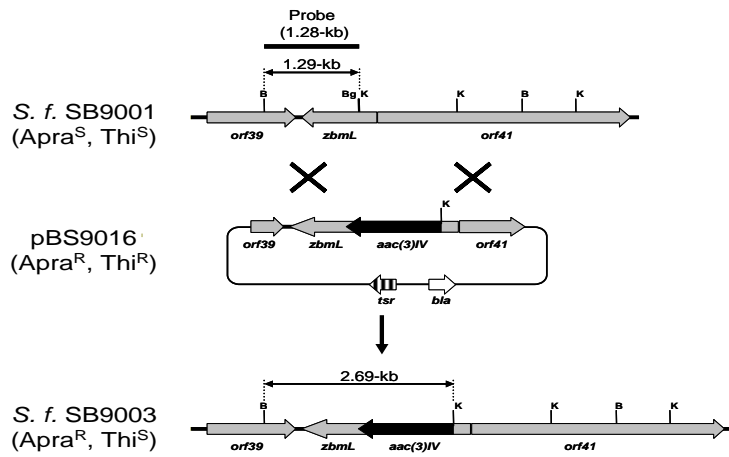

J

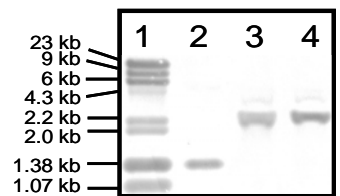

K

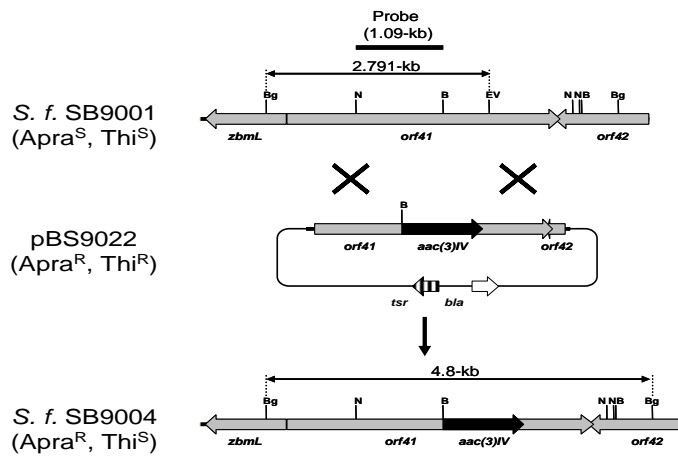

L

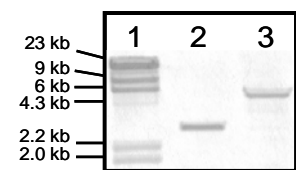

Supplement: b814075h.pdf [file b814075h.pdf]
